# Supplementary material
Source: publisher figshare collection journal article supplement (https://acs.figshare.com/ndownloader/files/12532856)
Supplement: Supplementary file 1 [file 12532856]

## **Supporting Information**

### **Implementing Lateral MoSe<sub>2</sub> P-N Homo-junction by Efficient**

### **Carrier Type Modulation**

*<sup>1</sup>Shuangqing Fan, <sup>1</sup>Wanfu Shen, <sup>1</sup>Chunhua An, <sup>1</sup>Zhaoyang Sun, <sup>1</sup>Sen Wu, <sup>1</sup>Linyan Xu, <sup>2</sup>Dong Sun, <sup>1</sup>Xiaodong Hu, <sup>1</sup>Daihua Zhang and <sup>1</sup>Jing Liu\**

<sup>1</sup>State Key Laboratory of Precision Measurement Technology and Instruments, School of Precision Instruments and Opto-electronics Engineering  
Tianjin University, No. 92 Weijin Road, Tianjin, 300072, China

<sup>2</sup>International Center for Quantum Materials, School of Physics, Peiking University, No. 5 Yiheyuan Road, Beijing 100871, China

Corresponding author e-mail: [jingliu\\_1112@tju.edu.cn](mailto:jingliu_1112@tju.edu.cn)

### Optical microscopy image of the MoSe<sub>2</sub> FET

The MoSe<sub>2</sub> was mechanically exfoliated on to SiO<sub>2</sub>/Si substrate and electron beam lithography was subsequently employed to pattern electrodes, followed by the deposition of 10 nm Cr and 30 nm Au as metal contacts. The electrode 2 and 3 were used as source and drain electrodes, respectively. We tested the MoSe<sub>2</sub> FET before and after annealing for various durations at 360 °C in air environment as shown in Fig. 1(a-c).

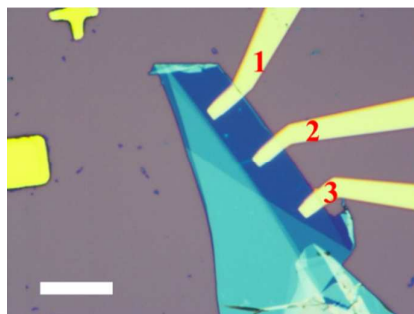

**Figure S1.** Optical microscopy image of the MoSe<sub>2</sub> FET. Scale bar is 10  $\mu\text{m}$ .

### Effects of atmospheric exposure on the electrical properties of annealed MoSe<sub>2</sub>

As the exposure time increases, the off current of the annealed MoSe<sub>2</sub> FET decreases from  $10^{-8}$  A to  $10^{-11}$  A. This may be due to the adsorption of gas molecular such as oxygen and

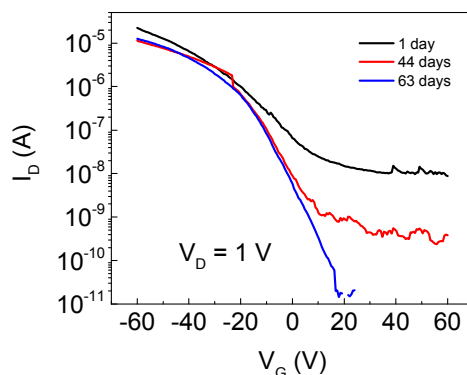

water on the surface of the MoSe<sub>2</sub>.

**Figure S2.** Transfer curves of an annealed MoSe<sub>2</sub> FET after being exposed in atmospheric environment for 1, 44 and 63 days.

### Temperature-dependent p-type modulation of the MoSe<sub>2</sub> FET

Generally, as the annealing temperature increases, the n-branch current of the MoSe<sub>2</sub> FET decreases, while the p-branch current increases. However, when the temperature increases to

390 °C, the on-state current and on/off ratio both decreases as compared to that at 360 °C. Hence, we chose the 360 °C as the optimum temperature to p-type dope MoSe<sub>2</sub>. The linear-scale curves are shown in Fig. 2a.

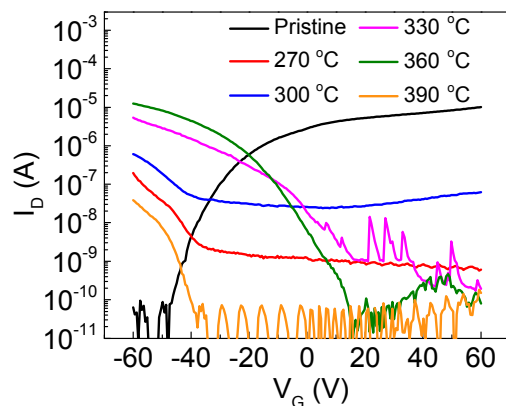

**Figure S3.** Semi-log scale  $I_D$ - $V_G$  curves of MoSe<sub>2</sub> FETs in a pristine state and after being treated by air RTA under various temperatures.

#### MoSe<sub>2</sub> thickness effect on RTA process

When the thickness is equal to or greater than 4.2 nm, the MoSe<sub>2</sub> can be successfully p-doped by annealing. In contrast, when the thickness is less than 2.1 nm (~4 layers), the channel current of MoSe<sub>2</sub> FET is cut off, which may be due to the disruption of the MoSe<sub>2</sub> lattice. Therefore, the thickness of MoSe<sub>2</sub> should be equal to or greater than 4.2 nm to be successfully p-doped by annealing. The associated hole mobility of the annealed MoSe<sub>2</sub> with different thicknesses is also presented in Fig. S4m, which decreases as a function of the thickness.

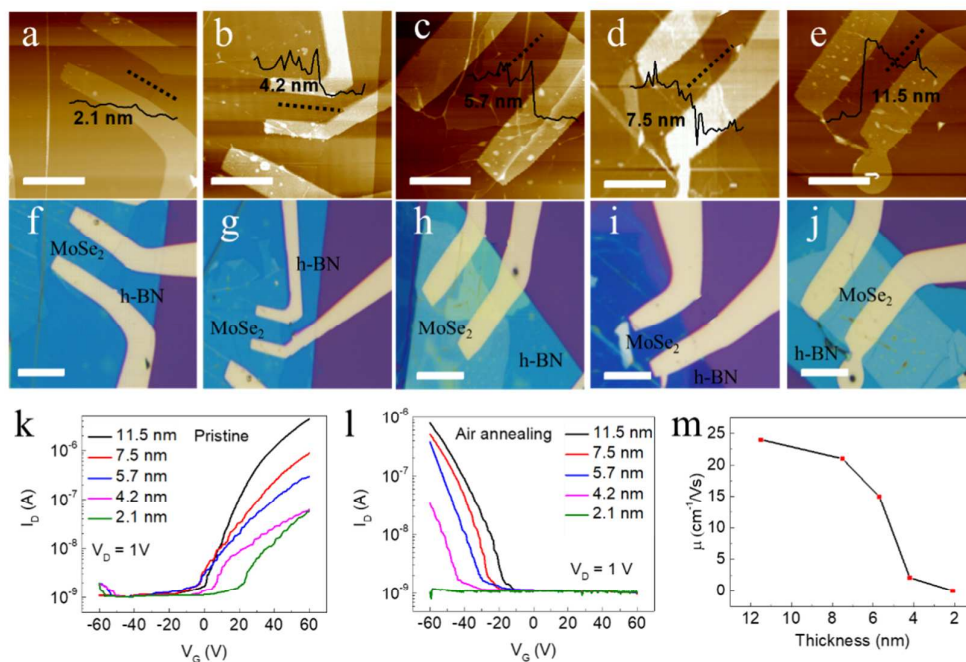

**Figure S4.** (a-e) AFM and (f-j) optical images of MoSe<sub>2</sub> flakes with thickness ranging from 2.1 nm to 11.5 nm. Scale bars are 5 μm. We first mechanically exfoliated h-BN (5~10 nm) onto SiO<sub>2</sub>/Si substrate, and then transfer MoSe<sub>2</sub> with various thickness on h-BN, followed by depositing source and drain electrodes. (k, l) Transfer characteristics of these MoSe<sub>2</sub> FETs before (k) and after (l) annealing for 4 min under 360 °C. (m) Hole mobility of the MoSe<sub>2</sub> FET as a function of flake thickness after annealing.

#### HR-TEM images of a MoSe<sub>2</sub> flake before and after air annealing

It can be seen from the images that the MoSe<sub>2</sub> flake exhibits hexagonal phase both before and after annealing, indicating that air annealing has limited impact on the lattice structure of MoSe<sub>2</sub>.

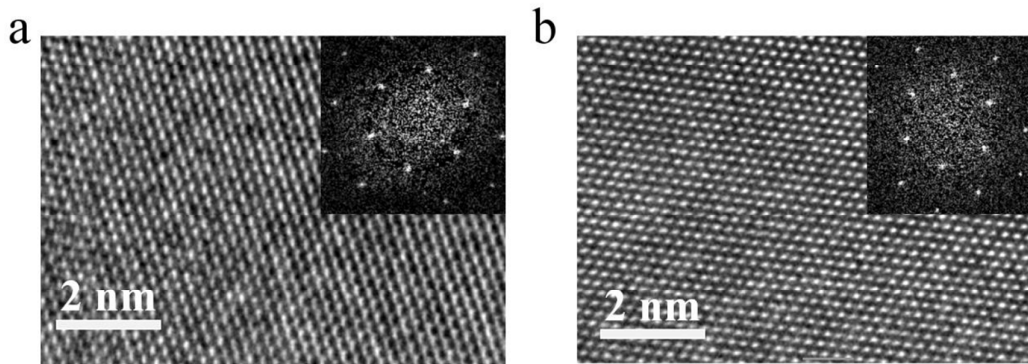

**Figure S5.** (a,b) High resolution TEM images of an MoSe<sub>2</sub> flake before (a) and after (b) annealing under 360 °C in air for 4 min. The insets in (a,b) are FFT patterns from the entire area of (a,b).

#### XPS surveys of MoSe<sub>2</sub> before and after air annealing

According to the XPS surveys and zoomed-in C1s core levels, no additional signals are found after annealing, indicating that the moisture and carbon species have limited affect.

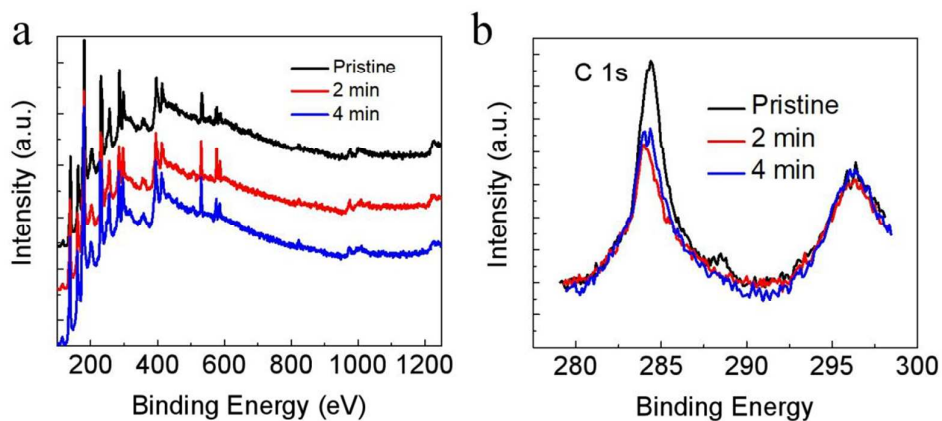

**Figure S6.** (a) Extended and (b) zoomed-in (at C1s core level) XPS spectra of MoSe<sub>2</sub> sample before and after annealing for 2 min and 4 min, respectively.

#### Electron density and mobility of MoSe<sub>2</sub> FET n-doped by PPh<sub>3</sub>

As the PPh<sub>3</sub> concentration increases from 0 mM to 30 mM, electron mobility  $\mu_n$  increases from 78.6 to 412.8 cm<sup>2</sup> V<sup>-1</sup> s<sup>-1</sup> and electron density  $n_e$  increases from  $8.8 \times 10^{11}$  to  $9.0 \times 10^{12}$  cm<sup>-2</sup>.

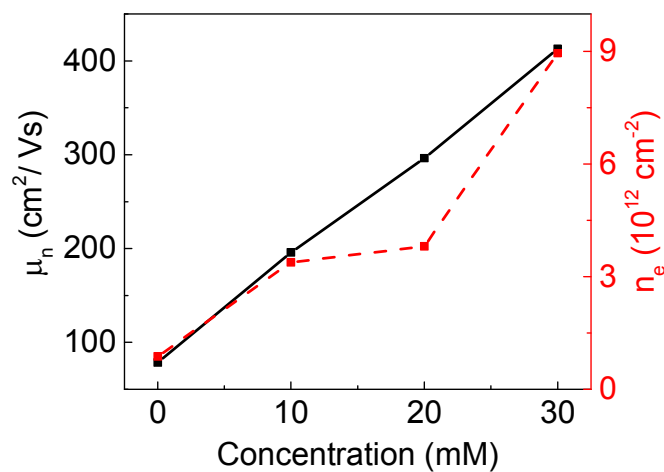

**Figure S7.** Plot of extracted  $n_e$  at  $V_G = 60$  V and  $\mu_n$  as a function of  $PPh_3$  concentration.

#### Intensity-dependent dynamic photo-response of $MoSe_2$ homo-junction

The illumination light intensity ranges from 0.01 to  $2.5 \text{ mW}\cdot\text{cm}^{-2}$  with the wavelength mixed at 532 nm. The gate and source-drain bias is 0 V.

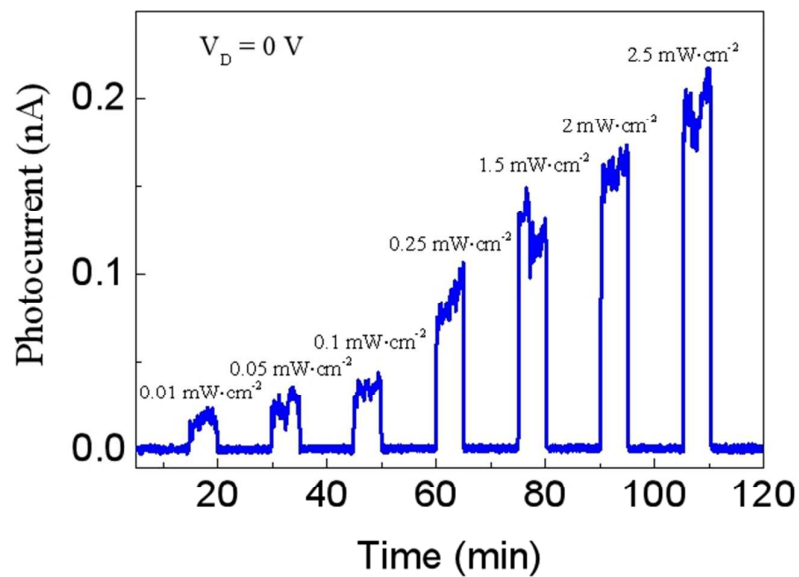

**Figure S8.** Intensity-dependent photo-response of the  $MoSe_2$  homo-junction.
